# Supplementary material for: MPT0G066, a novel anti-mitotic drug, induces JNK-independent mitotic arrest, JNK-mediated apoptosis, and potentiates antineoplastic effect of cisplatin in ovarian cancer
Source: PubMed Central journal article supplement (PMC4985652; doi:10.1038/srep31664), 2016-08-16
Supplement: srep31664-s1.pdf [file srep31664-s1.pdf]

## Supplementary Figures

### **MPT0G066, a novel anti-mitotic drug, induces JNK-independent mitotic arrest, JNK-mediated apoptosis, and potentiates antineoplastic effect of cisplatin in ovarian cancer**

Han-Li Huang<sup>1</sup>, Min-Wu Chao<sup>1</sup>, Ya-Chi Li<sup>2</sup>, Li-Hsun Chang<sup>2</sup>, Chun-Han Chen<sup>3</sup>, Mei-Chuan Chen<sup>4,5</sup>, Chun-Chun Cheng<sup>1</sup>, Jing-Ping Liou<sup>6</sup>, Che-Ming Teng<sup>2</sup> and Shioh-Lin Pan<sup>1,3,\*</sup>

<sup>1</sup> *The Ph.D. Program for Cancer Biology and Drug Discovery, College of Medical Science and Technology, Taipei Medical University, Taipei, Taiwan*

<sup>2</sup> *Pharmacological Institute, College of Medicine, National Taiwan University, Taipei, Taiwan*

<sup>3</sup> *Department of Pharmacology, School of Medicine, College of Medicine, Taipei Medical University, Taipei, Taiwan*

<sup>4</sup> *Ph.D. Program for the Clinical Drug Discovery from Botanical Herbs, College of Pharmacy, Taipei Medical University, Taipei, Taiwan.*

<sup>5</sup> *Graduate Institute of Pharmacognosy, College of Pharmacy, Taipei Medical University, Taipei, Taiwan.*

<sup>6</sup> *School of Pharmacy, College of Pharmacy, Taipei Medical University, Taipei, Taiwan*

#### **\*Correspondence:**

#### **Shioh-Lin Pan, Ph.D.**

The Ph.D. Program for Cancer Biology and Drug Discovery,  
College of Medical Science and Technology, Taipei Medical University,  
No. 250 Wuxing Street, Taipei 11031, Taiwan

E-mail: [slpan@tmu.edu.tw](mailto:slpan@tmu.edu.tw)

Phone: 886-2-27361661 ext 7671

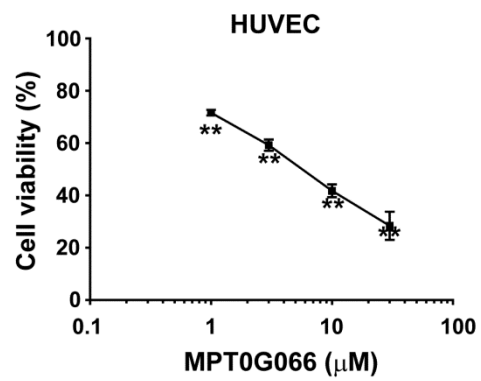

**Supplementary Fig. S1. MPT0G066 inhibits cell viability in human umbilical vein endothelial cells (HUVECs).** HUVEC were treated with various concentrations of MPT0G066 (1-30 μM) for 48 h. Cell viability was analyzed by MTT assay.

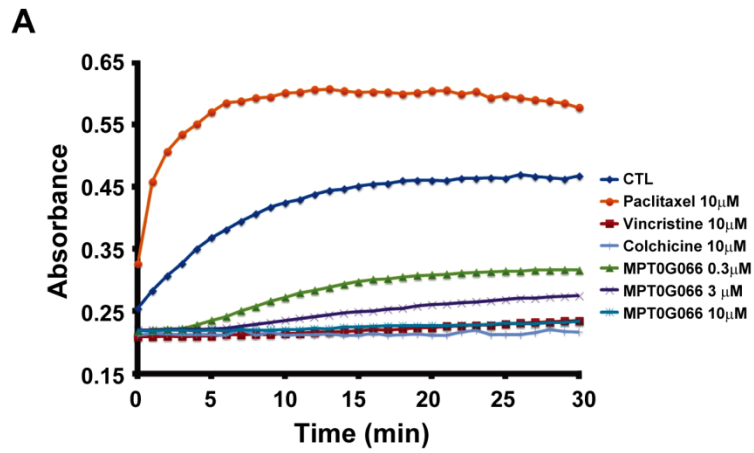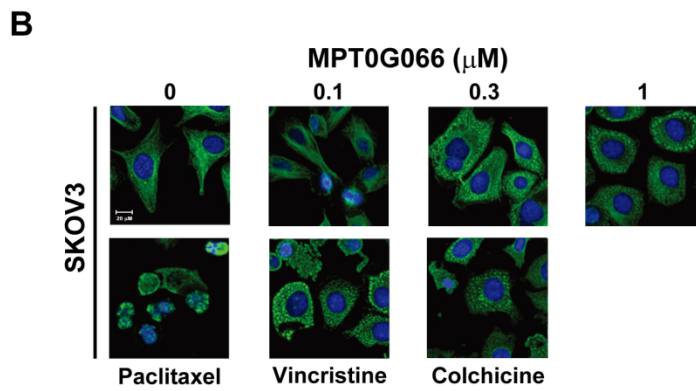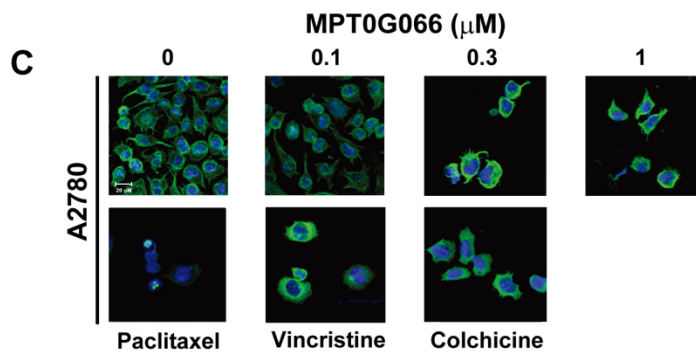

**Supplementary Fig. S2. MPT0G066 is a microtubule interfering agent and**

**suppresses tubulin polymerization.** (A) Tubulin in reaction buffer was incubated at

37°C with vehicle, the indicated concentrations of MPT0G066 (0.3, 3 and 10  $\mu$ M),

paclitaxel (10  $\mu$ M), vincristine (10  $\mu$ M) or colchicine (10  $\mu$ M). Then, microtubule

assembly was measured by spectrophotometry. (B) SKOV3 and (C) A2780 were incubated with vehicle, the various concentrations of MPT0G066 (0.1-3  $\mu\text{M}$ ), paclitaxel (0.03  $\mu\text{M}$ ), vincristine (0.03  $\mu\text{M}$ ) or colchicine (1  $\mu\text{M}$ ) for 18 h. The cellular microtubule network was analyzed by confocal microscopy using monoclonal anti- $\beta$ -tubulin antibody, FITC-conjugated anti-mouse antibody, and counterstaining with DAPI. Scale bar, 20  $\mu\text{m}$ .

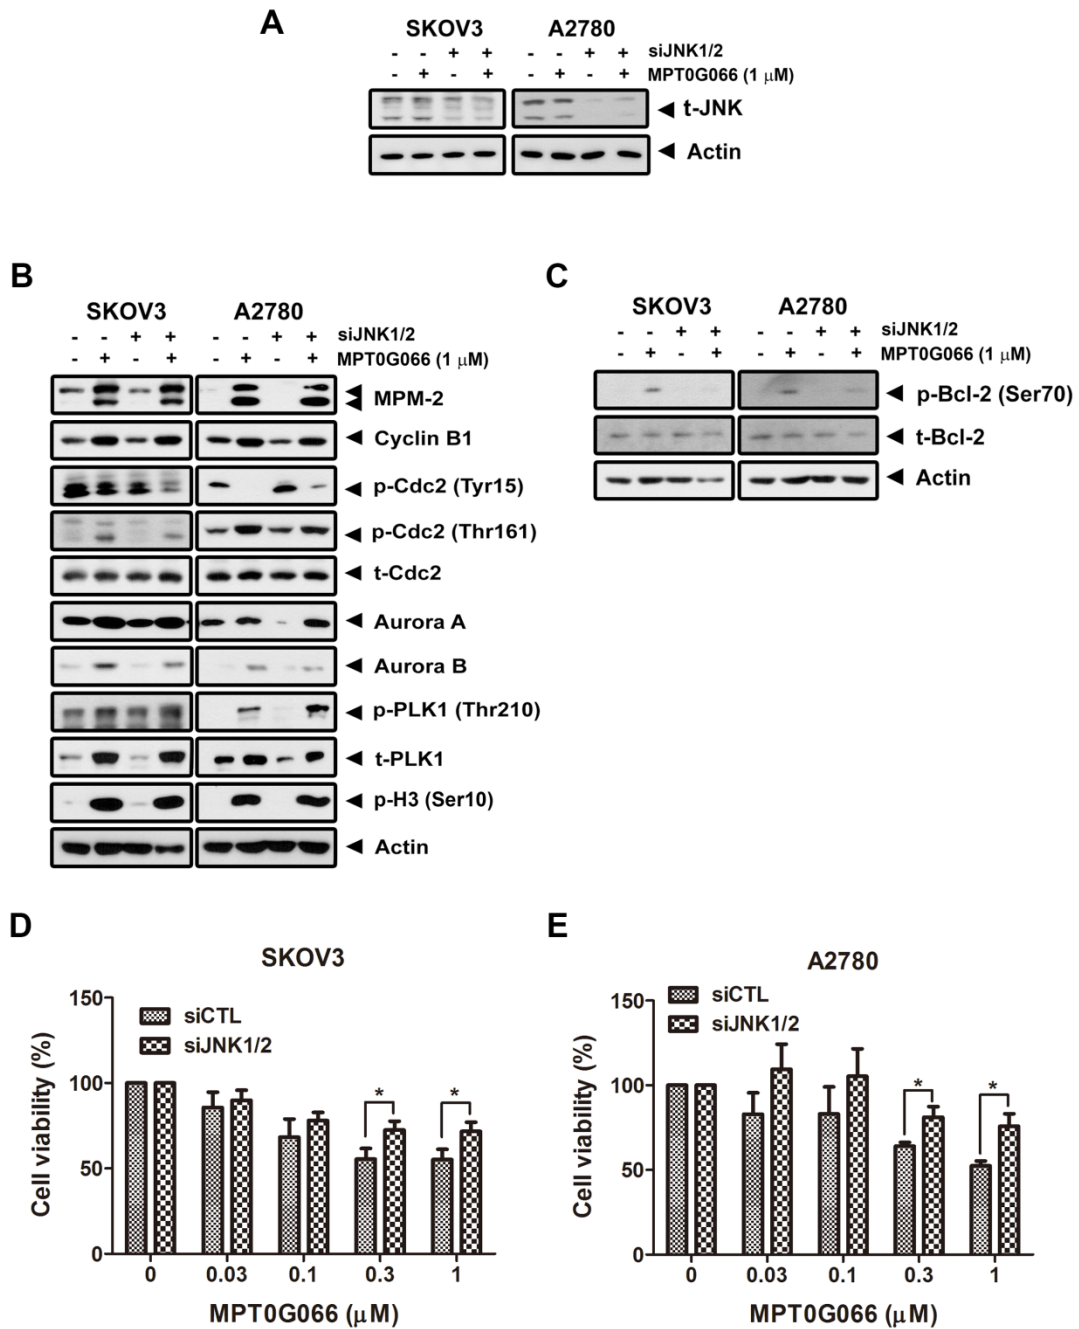

**Supplementary Fig. S3. The role of JNK in MPT0G066-regulated mitotic and apoptotic proteins and MPT0G066-inhibited ovarian cancer cell viability.** SKOV3 and A2780 were transiently transfected with JNK1/2 siRNA for 24 h followed by additional MPT0G066 treatment for (A, B and C) 24 h and collected for western blot

analysis, or (D and E) 48 h for cell viability evaluation using MTT assay.

**Supplementary Table S1.** Combination index (CI) values of MPT0G066 in combination with cisplatin in ovarian cancer cells

| SKOV3                  |                         |          | A2780                  |                         |          |
|------------------------|-------------------------|----------|------------------------|-------------------------|----------|
| MPT0G066<br>( $\mu$ M) | Cisplatin<br>( $\mu$ M) | CI value | MPT0G066<br>( $\mu$ M) | Cisplatin<br>( $\mu$ M) | CI value |
| 0.01                   | 1.25                    | 0.702    | 0.01                   | 1.25                    | 0.63     |
| 0.01                   | 2.5                     | 0.638    | 0.01                   | 2.5                     | 0.82     |
| 0.01                   | 5.0                     | 0.894    | 0.01                   | 5.0                     | 1.05     |
| 0.01                   | 10.0                    | 0.961    | 0.01                   | 10.0                    | 0.96     |
| 0.01                   | 20.0                    | 1.01     | 0.01                   | 20.0                    | 1.24     |
| 0.03                   | 1.25                    | 0.72     | 0.03                   | 1.25                    | 0.91     |
| 0.03                   | 2.5                     | 0.73     | 0.03                   | 2.5                     | 0.81     |
| 0.03                   | 5.0                     | 0.86     | 0.03                   | 5.0                     | 0.94     |
| 0.03                   | 10.0                    | 0.93     | 0.03                   | 10.0                    | 1.18     |
| 0.03                   | 20.0                    | 1.04     | 0.03                   | 20.0                    | 1.13     |
|                        |                         |          | 0.3                    | 1.25                    | 0.58     |
|                        |                         |          | 0.3                    | 2.5                     | 0.56     |
|                        |                         |          | 0.3                    | 5.0                     | 0.62     |
|                        |                         |          | 0.3                    | 10.0                    | 0.80     |
|                        |                         |          | 0.3                    | 20.0                    | 0.76     |
